# Supplementary material for: Astrocytes in mouse models of tauopathies acquire early deficits and lose neurosupportive functions
Source: Springer Nature journal article supplement (doi:10.1186/s40478-017-0478-9), 2017-11-27
Supplement: MOESM1 [file 25666270]

a

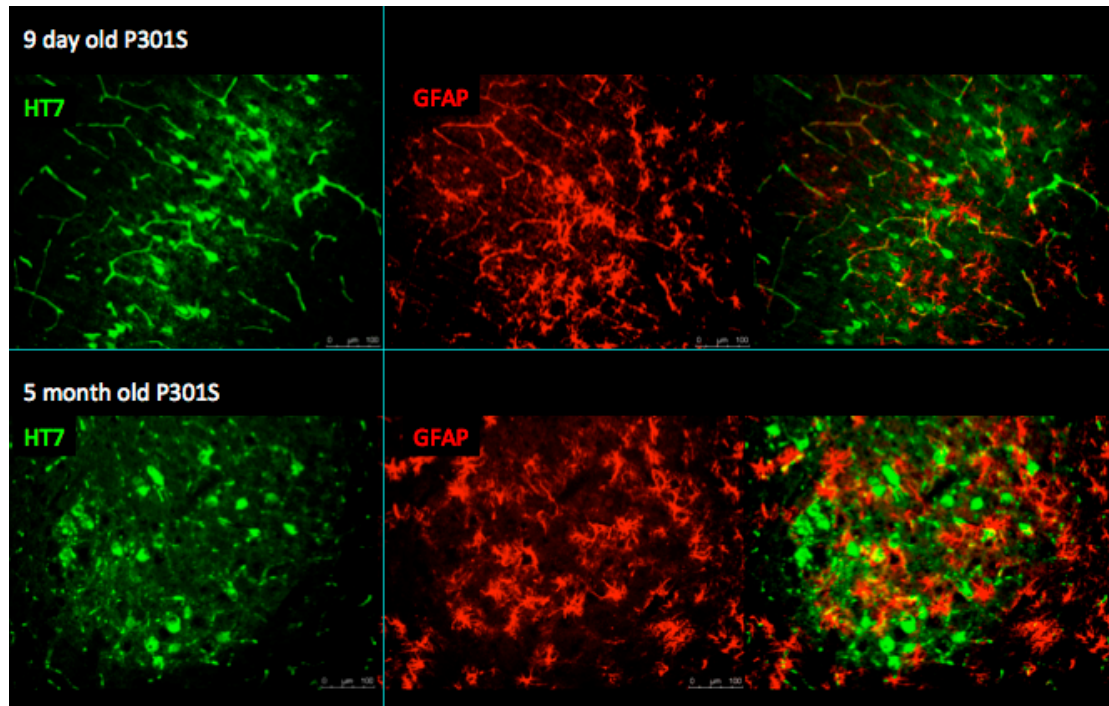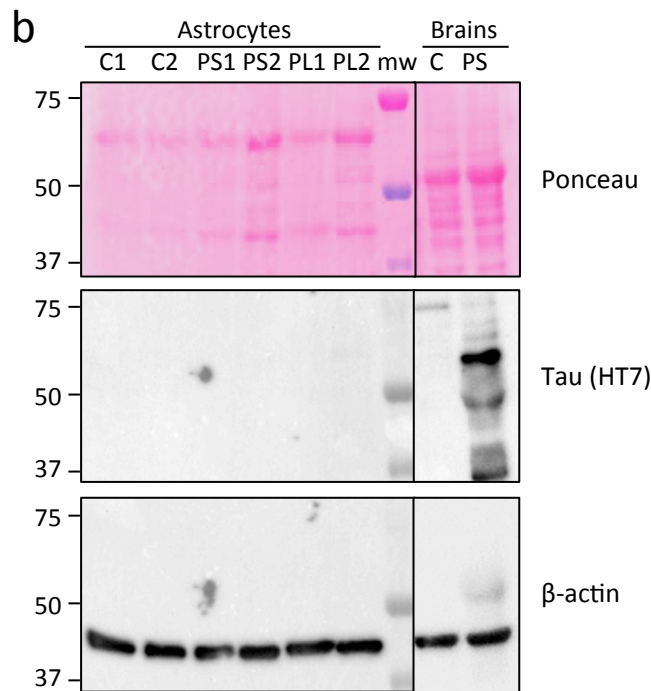

**Supplementary Fig. 1. a.** Immunofluorescent staining for human P301S tau (HT7, green) and GFAP (astrocytes, red). Brain sections (25  $\mu$ m) from 9 day (top row) and 5 m (bottom row) P301S mice showing no overlap. **b.** The blot shows that P301S tau is not expressed in cultured astrocytes from 9 day old C57 (C), P301S (PS) or P301L (PL) pups (middle panel, 2 independent 8-day cultures); the right hand two lanes show tau expression in brain extracts from 5 m C57 and 5 m P301S mice run on the same blot as negative and positive controls. Top panel, Ponceau; bottom panel, blot reprobbed for  $\beta$ -actin (without stripping). mw, marker lane.
